# Supplementary material for: Cost and cost-effectiveness of mHealth interventions for the prevention and control of type 2 diabetes mellitus: a protocol for a systematic review
Source: PubMed Central journal article supplement — BMJ Open. 2019 Apr 11;9(4):e027490. doi: 10.1136/bmjopen-2018-027490 (PMC6500237; doi:10.1136/bmjopen-2018-027490), 2019-04-11
Supplement: bmjopen-2018-027490supp003.pdf [file bmjopen-2018-027490supp003.pdf]

Additional file 3: Modified CHEERS Checklist to assess the quality of reporting cost in partial economic evaluations

|                    | Section                         | Item Number | Criteria                                                                                                                                                                                                                                                       | Yes | No | Partly | N/A |
|--------------------|---------------------------------|-------------|----------------------------------------------------------------------------------------------------------------------------------------------------------------------------------------------------------------------------------------------------------------|-----|----|--------|-----|
| Title and abstract | Title                           | 1           | Identify the study as an economic evaluation, or costing study and describe the intervention evaluated.                                                                                                                                                        |     |    |        |     |
|                    | Abstract                        | 2           | Provide a structured summary of objectives, perspective, setting, methods (including study design and inputs), results (including base-case and uncertainty analyses), and conclusions.                                                                        |     |    |        |     |
| Introduction       | Background and objectives       | 3           | Provide an explicit statement of the broader context for the study.<br><br>Present the study question and its relevance for health policy or practice decisions.                                                                                               |     |    |        |     |
| Methods            | Target population and subgroups | 4           | Describe characteristics of the base-case population and subgroups analysed including why they were chosen                                                                                                                                                     |     |    |        |     |
|                    | Setting and location            | 5           | State relevant aspects of the system(s) in which the decision(s) need(s) to be made.                                                                                                                                                                           |     |    |        |     |
|                    | Study perspective               | 6           | Describe the perspective of the study and relate this to the costs being evaluated                                                                                                                                                                             |     |    |        |     |
|                    | Time horizon                    | 7           | State the time horizon(s) over which costs are being evaluated and say why appropriate.                                                                                                                                                                        |     |    |        |     |
|                    | Discount rate                   | 8           | Report the choice of discount rate(s) used for costs and say why appropriate.                                                                                                                                                                                  |     |    |        |     |
|                    | Estimating resources and costs  | 9           | Describe approaches used to estimate resource use associated with the intervention. Describe primary or secondary research methods for valuing each resource item in terms of its unit cost. Describe any adjustments made to approximate to opportunity costs |     |    |        |     |

|            |                                                                      |     |                                                                                                                                                                                                                                                                                                                  |  |  |  |  |
|------------|----------------------------------------------------------------------|-----|------------------------------------------------------------------------------------------------------------------------------------------------------------------------------------------------------------------------------------------------------------------------------------------------------------------|--|--|--|--|
|            | Currency, price date, and conversion                                 | 10  | Report the dates of the estimated resource quantities and unit costs. Describe methods for adjusting estimated unit costs to the year of reported costs if necessary. Describe methods for converting costs into a common currency base and the exchange rate.                                                   |  |  |  |  |
|            | Analytical Methods                                                   | 11  | Describe all analytic methods supporting the evaluation. This could include methods for dealing with skewed, missing, or censored data; extrapolation methods; methods for pooling data; approaches to validate or make adjustments to a model; & methods for handling population heterogeneity and uncertainty. |  |  |  |  |
| Results    | Presenting the costs                                                 | 12a | Provide detailed breakdown of costs incurred to develop and implement the intervention.                                                                                                                                                                                                                          |  |  |  |  |
|            |                                                                      | 12b | Express costs per person or beneficiaries covered by the intervention.                                                                                                                                                                                                                                           |  |  |  |  |
|            | Characterising uncertainty                                           | 13  | Describe the effects of sampling uncertainty for estimated cost, together with the impact of methodological assumptions (such as discount rate, study perspective).                                                                                                                                              |  |  |  |  |
| Discussion | Study findings, limitations, generalisability, and current knowledge | 14  | Summarise key study findings and describe how they support the conclusions reached. Discuss limitations and the generalisability of the findings and how the findings fit with current knowledge.                                                                                                                |  |  |  |  |
| Other      | Funding                                                              | 15  | Describe how the study was funded and the role of the funder in the identification, design, conduct, and reporting of the analysis. Describe other non-monetary sources of support.                                                                                                                              |  |  |  |  |
|            | Conflicts of Interest                                                | 16  | Describe any potential for conflict of interest of study contributors in accordance with journal policy. In the absence of a journal policy, we recommend authors comply with International Committee of Medical Journal Editors recommendations.                                                                |  |  |  |  |
